# Supplementary material for: Enhanced near-infrared optical transmission in zinc germanium phosphide crystals via precise magnesium doping
Source: Royal Society of Chemistry journal article supplement (doi:10.1039/d4cp01302f), 2024-01-01
Supplement: d4cp01302f1.pdf [file d4cp01302f1.pdf]

## Supplementary information

# Enhanced Near-Infrared Optical Transmission in Zinc Germanium Phosphide Crystals via Precise Magnesium Doping

*Shichao Cheng*<sup>a</sup>, *Xueyan Zhang*<sup>a</sup>, *Xiangran Kong*<sup>a</sup>, *Tao Liu*<sup>a</sup>, *Jingdong Yan*<sup>a</sup>,

*Tetiana Prikhna*<sup>b</sup>, *Yunfei Shang*<sup>a,\*</sup>, *Zuotao Lei*<sup>a,\*</sup> and *Chunhui Yang*<sup>a</sup>

<sup>a</sup> MIT Key Laboratory of Critical Materials Technology for New Energy Conversion  
and Storage, School of Chemistry and Chemical Engineering, Harbin Institute of  
Technology, Harbin, 150001, People's Republic of China

<sup>b</sup> V. N. Bakul Institute for Superhard Materials of the National Academy of Sciences  
of Ukraine

## Experiment section

**X-ray Diffraction.** The powder X-ray diffraction patterns were collected by a Bruker D2 PHASER Powder X-ray diffractometer using Cu K $\alpha$  radiation ( $\lambda = 1.54059 \text{ \AA}$ ) at room temperature. The  $2\theta$  range was set from  $10^\circ$  to  $80^\circ$  and scan was taken at a step size of  $0.01^\circ$  and a fixed time of 0.5 s. The mercury program was used to calculate simulated patterns from single-crystal reflection data. The X-ray rocking curves of the crystals were measured on PANalytical Empyrean high resolution x-ray diffractometer with Cu K $\alpha$  radiation ( $\lambda = 1.54059 \text{ \AA}$ ).

**UV–vis–NIR.** UV–Vis–NIR diffuse transmittance was performed at room temperature on a computer-controlled Agilent Carry 5000 UV–vis–NIR spectrometer equipped with an integrating sphere.

**Elemental Analysis.** The ZGP nanoplate orientated normal to the (001) face with the size of 50 nm was fabricated by focused ion beam-scanning electron microscopy (FIB-SEM) system to be measured by a spherical aberration Cs-STEM (Titan Themis Cubed G2 60-300). The percentage of chemical element content was measured by scanning transmission electron microscopy equipped with energy dispersive X-ray spectroscopy (STEM-EDS). To determine the concentrations of magnesium in the doped samples, glow discharge mass spectrometry (GDMS) measurements were taken using a Nu instruments-Astrum system which provides a ppb/ppt (weight) level detection limit.

**Photoluminescence.** In addition, PL spectra were collected on a 1 mm-thick ZGP crystal using a spectrometer (TR550MST) with a 532 nm laser. The PL data were obtained from liquid nitrogen using a grating spectrometer and either a PMT (GaAs response), or Ge detector. Temperature-dependent PL spectra of ZGP crystal were collected 100 K. All the luminescence dynamics were recorded with a 500 MHz Tektronix digital oscilloscope.

**Electron paramagnetic resonance.** The EPR was carried out using a Bruker EMX PLUS spectrometer operating at the X-band ( $\nu \approx 9.41 \text{ GHz}$ ). Temperatures in the range

100–300 K were achieved with Oxford Instruments continuous flow cryostats. The sample temperature 100 K for the Zn vacancy signal.

**Theoretical Calculation.** The Vienna Ab-initio Simulation Package (VASP) was employed to perform all the density functional theory (DFT) calculations. The generalized gradient approximation (GGA) with the Perdew–Buker–Ernzerhof (PBE) functional was adopted<sup>1</sup>. The projected augmented wave (PAW) potentials were chosen to describe the core-electron interactions and take valence electrons into account using a plane-wave basis set with a kinetic energy cutoff of 400 eV. Partial occupancies of the Kohn-Sham orbitals were allowed using the Gaussian smearing method and a width of 0.01 eV. The electronic energy was considered self-consistent when the energy change was smaller than  $10^{-6}$  eV. The Brillouin zone integration was performed using  $2 \times 2 \times 1$ . On the LOBSTER side<sup>2-5</sup>, the original basis set and its basic functions (*s*, *p* and *d*) manage to reconstruct the PAW electronic structure. To realize a more accurate description of the bandgap, the Heyd–Scuseria–Ernzerhof (HSE06) hybrid DFT functional was performed.

Defect formation energy of the charge state *q* dependent on the Fermi level position were calculated in accordance with the literature<sup>6, 7</sup>:

$$\Delta E_f(\alpha, q) = E(\alpha, q) - E(per) - \Delta n_i \mu_i + q E_F$$

where  $E(\alpha, q)$  means the total energy calculated from the supercell with defects  $\alpha$  in its charge state  $q$ , and  $E(per)$  is the total energy of the perfect crystal supercells.  $\mu_i$  is the atomic chemical potential of an atom reservoir of element  $i$ ,  $\Delta n_i$  is the change in the number of atoms of species  $i$ , which has been added ( $\Delta n_i > 0$ ) or removed ( $\Delta n_i < 0$ ).  $E_F$  is the Fermi energy referenced to the VBM level.

Table S1. Calculated formation energies of different point defects in ZGP crystals.

|                          | $V_{Zn}$ | $V_P$    | $Ge_{Zn}$ | $Ge_P$ |
|--------------------------|----------|----------|-----------|--------|
| Defects formation energy | -3.57eV  | -4.48 eV | -1.09 eV  | 2.25eV |

Table S2. Calculated total energy of ZGP and ZGP-Mg supercell structures.

|              | ZGP        | ZGP-Mg     |
|--------------|------------|------------|
| Total energy | -548.99 eV | -553.68 eV |

Table S3. Calculated cell parameters of ZGP- $V_{Zn}$  and ZGP-Mg structures.

|               | $a$ (Å) | $b$ (Å) | $c$ (Å) | $\alpha$ (°) | $\beta$ (°) | $\gamma$ (°) |
|---------------|---------|---------|---------|--------------|-------------|--------------|
| ZGP- $V_{Zn}$ | 5.54    | 5.54    | 10.09   | 90           | 90          | 90           |
| ZGP-Mg        | 5.49    | 5.49    | 10.74   | 90           | 90          | 90           |

Table S4. Reported absorption coefficients and optical transmittances at 2  $\mu$ m of grown ZGP crystals.

| Crystal thickness (mm) | Growth Methods   | Absorption coefficient for 2.09 $\mu$ m o light ( $cm^{-1}$ ) | Optical transmittance at 2 $\mu$ m (%) | Reference |
|------------------------|------------------|---------------------------------------------------------------|----------------------------------------|-----------|
| 1.3                    | VB <sup>a</sup>  | 1.3                                                           | 45                                     | 8         |
| 1.5                    | VB               | -                                                             | 46                                     | 9         |
| 2.5                    | VB               | 0.25                                                          | 49                                     | 10        |
| 3                      | VB               | -                                                             | 40                                     | 11        |
| 2                      | VB               | 0.12                                                          | -                                      | 12        |
| 3                      | VB               | -                                                             | 49                                     | 13        |
| 10                     | VB               | 0.29                                                          | -                                      | 14        |
| 2                      | VB               | -                                                             | 45                                     | 15        |
| 4                      | VB               | -                                                             | 47                                     | 16        |
| 12                     | HGF <sup>b</sup> | 0.26                                                          | -                                      | 17        |
| 6                      | VB               | -                                                             | 49                                     | 18        |
| 1                      | VB               | 0.02                                                          | 56                                     | This work |
| 6                      | VB               | 0.11                                                          | 50.5                                   | This work |

a: vertical Bridgman technique (VB)

b: horizontal-gradient-freeze (HGF)

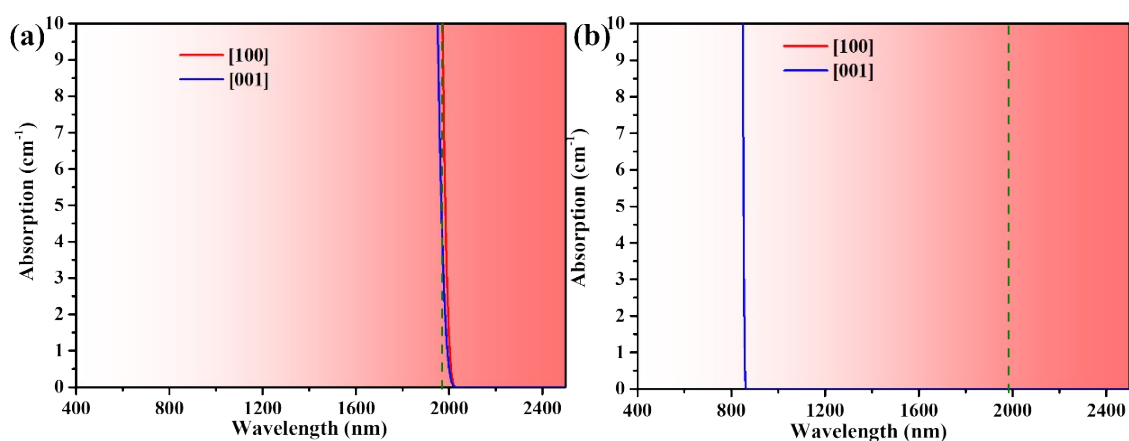

Figure S1. Calculated enlarged optical absorption spectra of the ZGP- $V_{Zn}$  and ZGP-Mg structures.

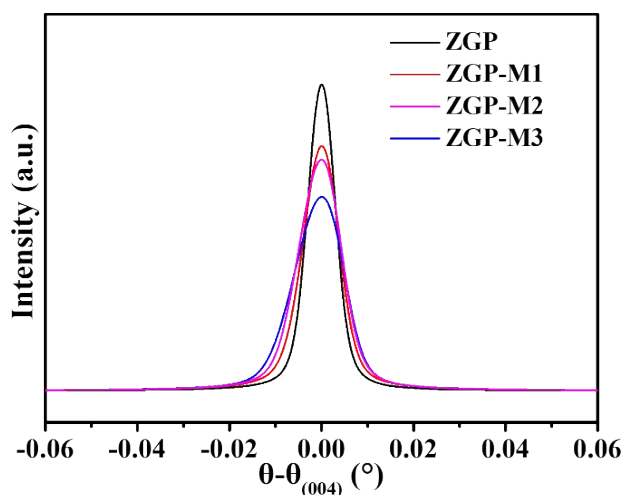

Figure S2. Rocking curves of (004) crystallographic plane in magnesium-doped and undoped ZGP single crystals.

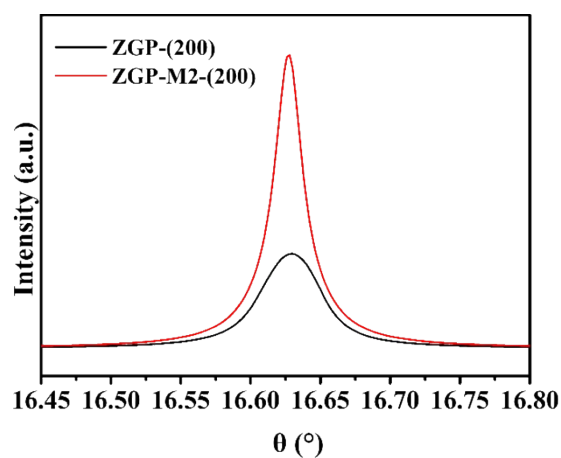

Figure S3. Rocking curves of (200) crystallographic plane in ZGP-M2 and undoped ZGP single crystals.

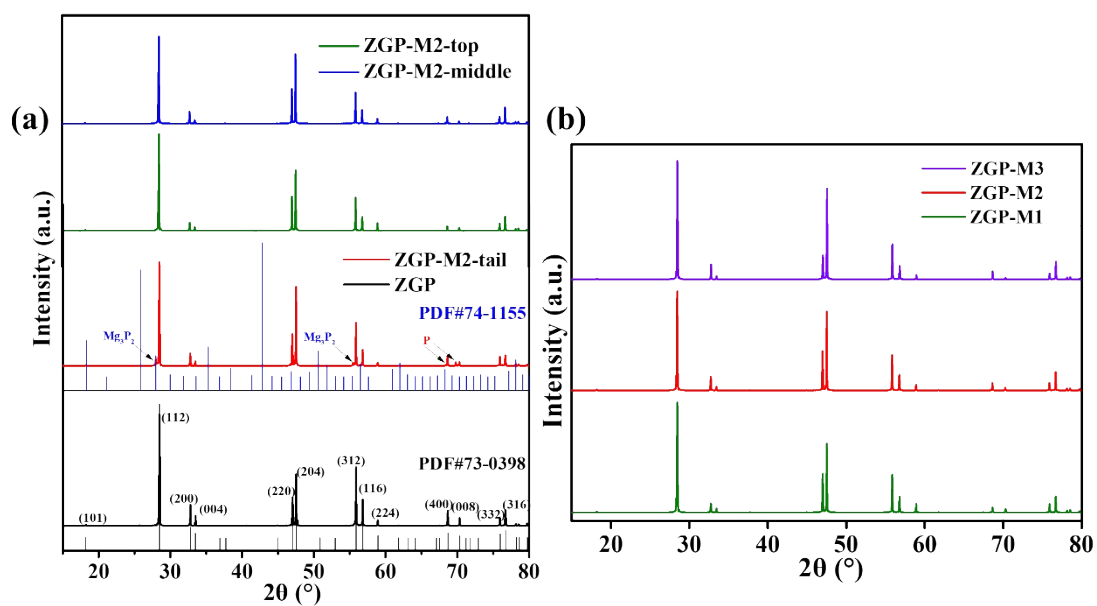

Figure S4. (a) XRD patterns were obtained from different segments of the ZGP-M2 crystals; (b) The XRD patterns specifically from the middle portions of the ZGP-M1, ZGP-M2, and ZGP-M3 crystals.

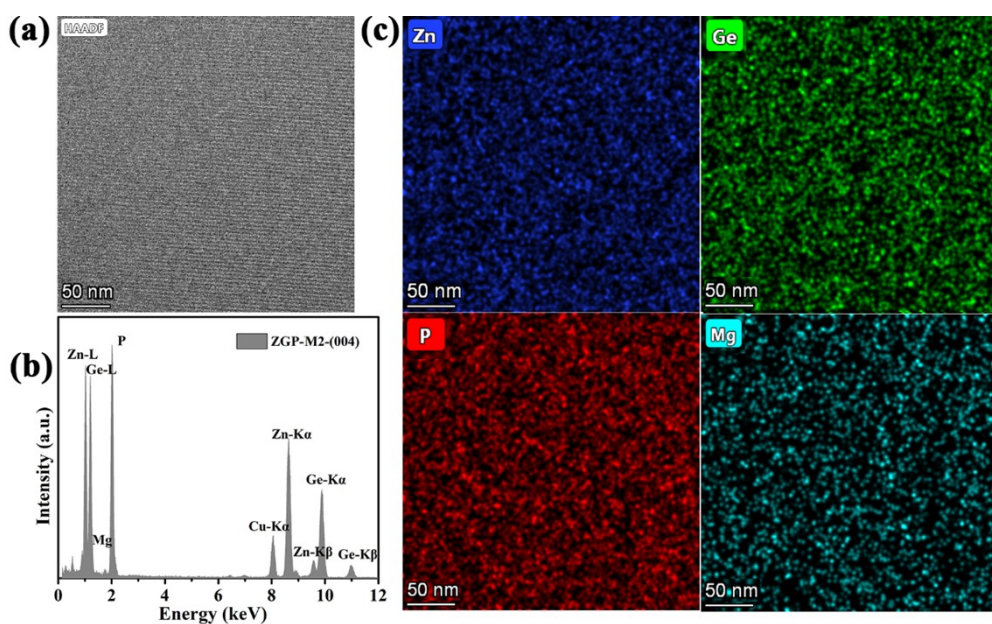

Figure S5. (a) STEM image, (b) STEM-EDS pattern of a ZGP nanoplate and (c) corresponding STEM-EDS chemical element maps.

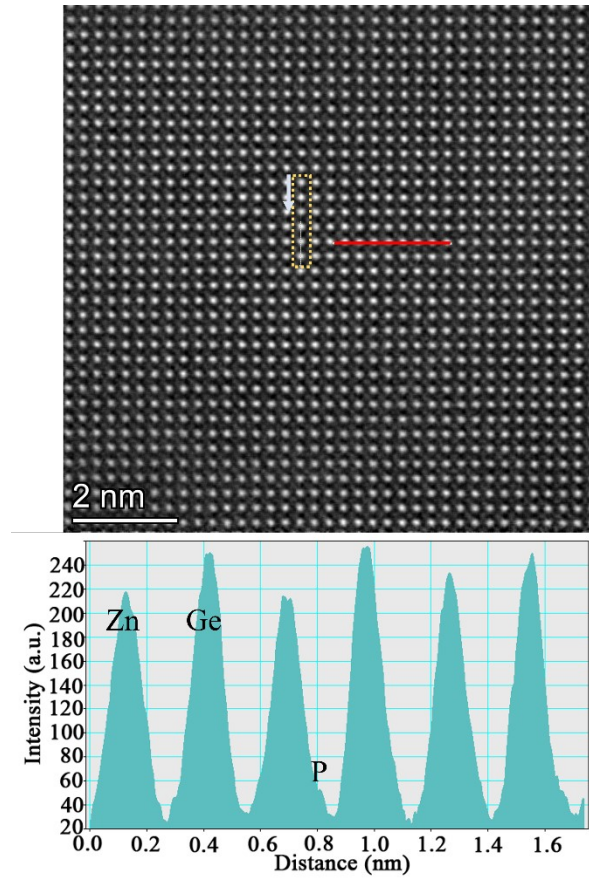

Figure S6. HAADF-STEM images of a chalcopyrite ZGP-M2 nanoplate and intensity profiles recorded by scanning along the direction of the ZGP-M2 (001) plane from the image (yellow line).

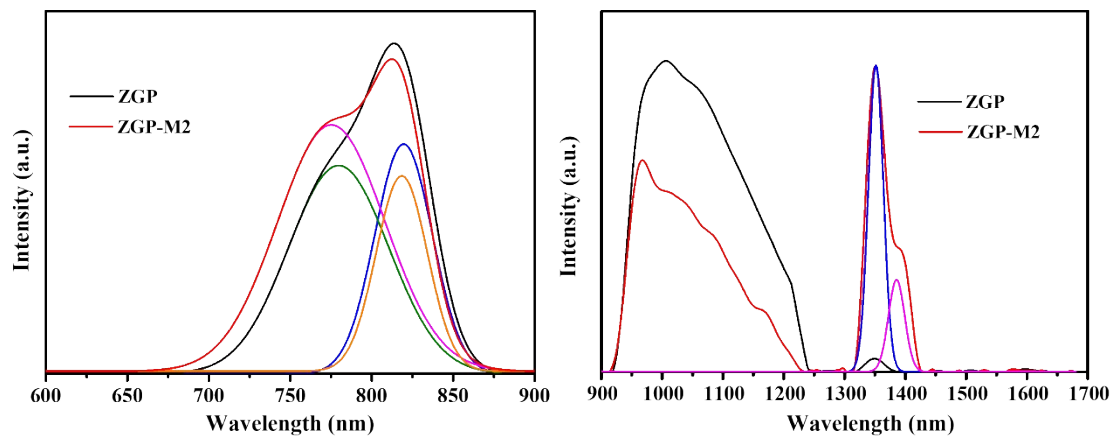

Figure S7. (a) The PL spectra of the samples were recorded at a temperature of 100 K, covering a wavelength range of 600-900 nm and (b) 900-1700 nm.

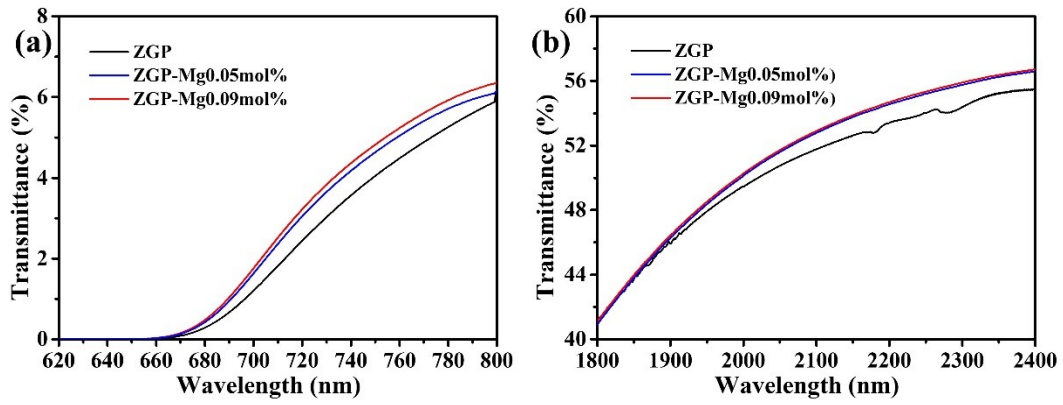

Figure S8. Amplified transmission spectra of ZGP and magnesium-doped ZGP at cut-off edge region (a) and near-infrared region (b).

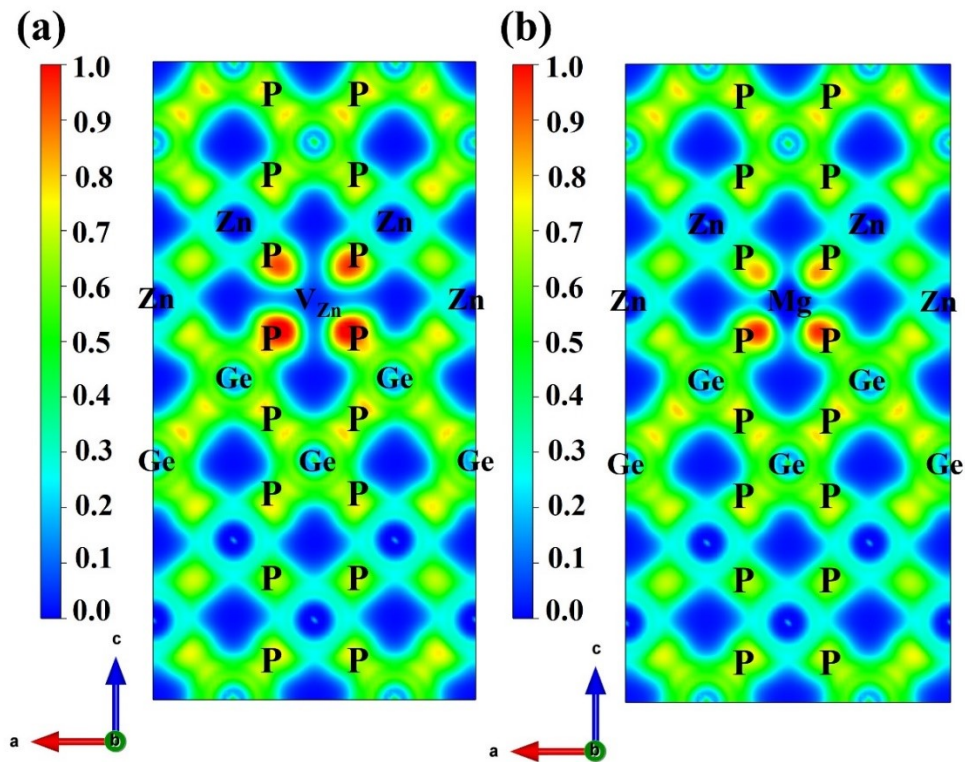

Figure S9. Electron localization function maps of (a) ZGP- $V_{Zn}$  structure, and (b) ZGP-Mg structure.



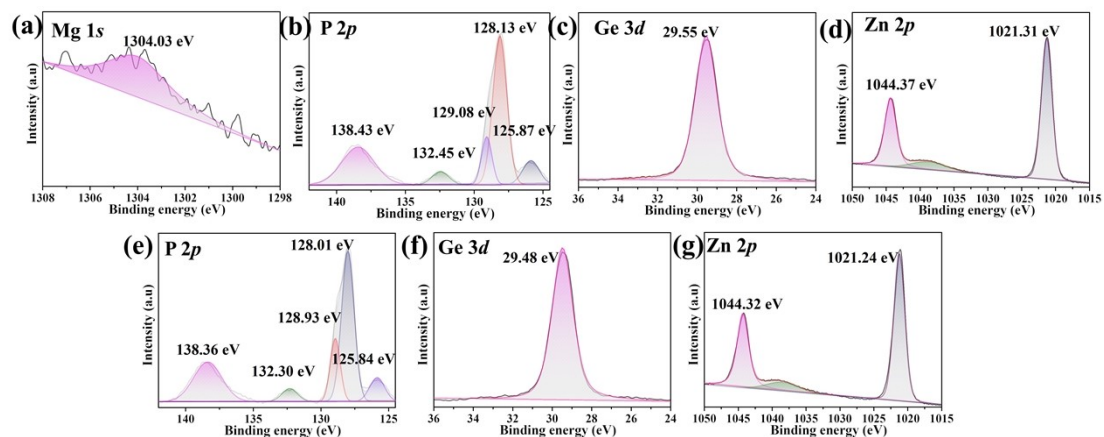

Figure S10. The high-resolution XPS spectra of (a) Mg 1s, (b) Zn 2p, (c) Ge 3d and (d) P 2p orbitals in ZGP-M2 crystal; (e) Zn 2p, (f) Ge 3d and (g) P 2p orbitals in ZGP crystal.

## References

1. J. P. Perdew, K. Burke and M. Ernzerhof, Generalized gradient approximation made simple, *Phys. Rev. Lett.*, 1996, **77**, 3865-3868.
2. S. Maintz, V. L. Deringer, A. L. Tchougreeff and R. Dronskowski, Analytic projection from plane-wave and PAW wavefunctions and application to chemical-bonding analysis in solids, *J. Comput. Chem.*, 2013, **34**, 2557-2567.
3. S. Maintz, V. L. Deringer, A. L. Tchougreeff and R. Dronskowski, LOBSTER: a tool to extract chemical bonding from plane-wave based DFT, *J. Comput. Chem.*, 2016, **37**, 1030-1035.
4. R. Dronskowski and P. E. Bloechl, Crystal orbital Hamilton populations (COHP): energy-resolved visualization of chemical bonding in solids based on density-functional calculations, *J. Phys. Chem.*, 1993, **97**, 8617-8624.
5. V. L. Deringer, A. L. Tchougréeff and R. Dronskowski, Crystal orbital hamilton population (COHP) analysis as projected from plane-wave basis sets, *J. Phys. Chem. A*, 2011, **115**, 5461-5466.
6. S. Lany and A. Zunger, Assessment of correction methods for the band-gap problem and for finite-size effects in supercell defect calculations: Case studies for ZnO and GaAs, *Phys. Rev. B*, 2008, **78**.
7. Y. Koyama, H. Arai, I. Tanaka, Y. Uchimoto and Z. Ogumi, First principles study of dopant solubility and defect chemistry in LiCoO<sub>2</sub>, *J. Mater. Chem. A*, 2014, **2**, 11235-11245.
8. Q. Fan, S. Zhu, B. Zhao, B. Chen, Z. He, J. Cheng and T. Xu, Influence of annealing on optical and electrical properties of ZnGeP<sub>2</sub> single crystals, *J. Cryst. Growth.*, 2011, **318**, 725-728.
9. Y. J. Yang, Y. J. Zhang, Q. T. Gu, H. J. Zhang and X. T. Tao, Growth and annealing characterization of ZnGeP<sub>2</sub> crystal, *J. Cryst. Growth.*, 2011, **318**, 721-724.
10. G. D. Zhang, X. T. Tao, S. P. Wang, G. D. Liu, Q. Shi and M. H. Jiang, Growth and thermal annealing effect on infrared transmittance of ZnGeP<sub>2</sub> single crystal, *J. Cryst. Growth.*, 2011, **318**, 717-720.

11. X. Zhao, S. F. Zhu and Y. Q. Sun, Growth of ZnGeP<sub>2</sub> Single Crystal by Three-Temperature-Zone Furnace, *Advanced Materials Research*, 2011, **179-180**, 945-948.
12. Z. Y. Wang, M. S. Mao, H. X. Wu, Y. B. Ni, C. B. Huang and X. D. Cheng, Study on annealing of infrared nonlinear optical crystal ZnGeP<sub>2</sub>, *J. Cryst. Growth.*, 2012, **359**, 11-14.
13. H. X. Wu, Z. Y. Wang, Y. B. Ni, M. S. Mao, C. B. Huang and X. D. Cheng, Vertical gradient freeze growth of ZnGeP<sub>2</sub> crystals for nonlinear optical applications, *J. Cryst. Growth.*, 2012, **353**, 158-161.
14. G. D. Zhang, X. T. Tao, S. P. Wang, Q. Shi, H. P. Ruan and L. L. Chen, Growth improvement and quality evaluation of ZnGeP<sub>2</sub> single crystals using vertical Bridgman method, *J. Cryst. Growth.*, 2012, **352**, 67-71.
15. L. Q. Cao, B. J. Zhao, S. F. Zhu, B. J. Chen, Z. Y. He, D. H. Yang, H. Liu and H. Xie, Annealing and optical homogeneity of large ZnGeP<sub>2</sub> single crystal, *Rare Metals*, 2016, **41**, 3214-3219.
16. D. H. Yang, B. J. Zhao, B. J. Chen, S. F. Zhu, Z. Y. He, Z. R. Zhao and M. D. Liu, Growth of ZnGeP<sub>2</sub> single crystals by modified vertical Bridgman method for nonlinear optical devices, *Mater. Sci. Semicond. Process.*, 2017, **67**, 147-151.
17. P. G. Schunemann, K. L. Schepler and P. A. Budni, Nonlinear Frequency Conversion Performance of AgGaSe<sub>2</sub>, ZnGeP<sub>2</sub>, and CdGeAs<sub>2</sub>, *MRS Bull.*, 2013, **23**, 45-49.
18. Z. Lv, Y. Shen, Y. Wen, E.-P. Wang, Z.-M. Wang, W.-L. Li, Y. Bo and Q.-J. Peng, High power widely tunable mid-IR (5–7.2 μm) ZnGeP<sub>2</sub> optical parametric oscillator pumped by a 2.09 μm laser, *Infrared Phys. Technol.*, 2023, **134**, 104879.
